# Supplementary material
Source: publisher site journal article supplement (https://www.dovepress.com/get_supplementary_file.php?f=328559.docx)
Supplement: Supplementary file 1 [file get_supplementary_file.php]

**Supplementary Table 1. Sequences of primers used for quantitative RT-PCR and si-MLLT11.**

| **Gene** | **Species** | **Primer sequence** |
| --- | --- | --- |
| hsa_circ_0035554 | Homo sapiens | F:5ʹ-TTTCGGACACATCTGGTGAC-3ʹ  R:5ʹ-TGGTAGGCGAAGGCAATATC-3ʹ |
| hsa_circ_0009034 | Homo sapiens | F:5ʹ-CTTTGAGCTCCGGAAAGTTG-3ʹ  R:5ʹ-TGAGCTCTGTCAACCCCTTC-3ʹ |
| hsa_circ_0007440 | Homo sapiens | F:5ʹ-GCGAATTGTGGCAGAGTGTA-3ʹ  R:5ʹ-TCACAGAAGAGCAGGGATCA-3ʹ |
| hsa_circ_0003205 | Homo sapiens | F:5ʹ-TGCTGGCAATGAACAAGACT-3ʹ  R:5ʹ-GGATCATCTGCGAACTCTCC-3ʹ |
| MLLT11 | Homo sapiens | F:5ʹ-TCAGATACAGCCACCTAC-3ʹ  R:5ʹ-TAGAGCAAGTCCATGTCG-3ʹ |
| MLLT11 siRNA | Homo sapiens | 5ʹ-CCUGUGAGUAGCCAGUACA-3ʹ |
| SLC7A7 | Homo sapiens | F:5ʹ- CCTGCTTATATCCAGGACCAA-3ʹ  R:5ʹ-GGCCACTTCATACTCAGTGC-3ʹ |
| SLC7A7 siRNA | Homo sapiens | F:5ʹ-GGCACCACCAUUAAGAAAUTT-3ʹ  R:5ʹ-AUUUCUUAAUGGUGGUGCCTT-3ʹ |
